# Supplementary material for: A large scale hearing loss screen reveals an extensive unexplored genetic landscape for auditory dysfunction
Source: Springer Nature journal article supplement (doi:10.1038/s41467-017-00595-4), 2017-10-06
Supplement: MOESM1 [file 41467_2017_595_MOESM1_ESM.pdf › 41467_2017_595_MOESM1_ESM.pdf]

# SI GUIDE

File Name: Supplementary Information

Description: Supplementary Tables.

File Name: Supplementary Data

Description: Initial candidate hearing loss lines.

File Name: Peer Review File

Description:

**Supplementary Table 1.** Sixty-seven Hearing Loss Genes Identified from the IMPC programme

| Gene                                                                  | Symbol        | Allele                                  | Zygoty | Screened | Centre | Status | HL     |
|-----------------------------------------------------------------------|---------------|-----------------------------------------|--------|----------|--------|--------|--------|
| RIKEN cDNA A730017C20 gene                                            | A730017C20Rik | A730017C20Rik <sup>tm1b(KOMP)Wtsi</sup> | Hom    | M+F      | WTSI   | Novel  | Severe |
| AP2 associated kinase 1                                               | Aak1          | Aak1 <sup>tm1b(EUCOMM)Hmgu</sup>        | Hom    | M+F      | ICS    | Novel  | High   |
| acyl-CoA synthetase long-chain family member 4                        | Acsl4         | Acsl4 <sup>tm1a(EUCOMM)Wtsi</sup>       | Hom    | F        | WTSI   | Novel  | High   |
| activin receptor IIA                                                  | Acvr2a        | Acvr2a <sup>tm1.1(KOMP)Vlclg</sup>      | Hom    | F        | TCP    | Novel  | Mild   |
| adhesion G protein-coupled receptor B1                                | Adgrb1        | Adgrb1 <sup>tm2a(EUCOMM)Wtsi</sup>      | Hom    | M+F      | WTSI   | Novel  | Mild   |
| adhesion G protein-coupled receptor V1                                | Adgrv1        | Adgrv1 <sup>tm1.1(KOMP)Vlclg</sup>      | Hom    | M+F      | UCD    | Known  | Severe |
| alpha-2-HS-glycoprotein                                               | Ahsg          | Ahsg <sup>tm1.1(KOMP)Vlclg</sup>        | Hom    | M+F      | UCD    | Novel  | High   |
| ankyrin repeat domain 11                                              | Ankrd11       | Ankrd11 <sup>tm1b(EUCOMM)Wtsi</sup>     | Het    | M+F      | ICS    | Novel  | Mild   |
| adaptor-related protein complex 3, mu 2 subunit                       | Ap3m2         | Ap3m2 <sup>em1H</sup>                   | Hom    | M+F      | H      | Novel  | Mild   |
| adaptor-related protein complex 3, sigma 1 subunit                    | Ap3s1         | Ap3s1 <sup>tm1b(EUCOMM)Hmgu</sup>       | Hom    | M+F      | GMC    | Novel  | Mild   |
| ATPase, Ca++ transporting, plasma membrane 1                          | Atp2b1        | Atp2b1 <sup>tm1b(KOMP)Wtsi</sup>        | Het    | M+F      | UCD    | Novel  | Low    |
| RIKEN cDNA B020004J07                                                 | B020004J07Rik | B020004J07Rik <sup>tm1b(KOMP)Wtsi</sup> | Hom    | M+F      | UCD    | Novel  | Low    |
| BAI1-associated protein 2-like 2                                      | Baiap2l2      | Baiap2l2 <sup>tm1b(EUCOMM)Hmgu</sup>    | Hom    | M+F      | ICS    | Novel  | Mild   |
| coiled-coil domain containing 88C                                     | Ccdc88c       | Ccdc88c <sup>tm1b(KOMP)Mbp</sup>        | Hom    | M+F      | UCD    | Novel  | High   |
| coiled-coil domain containing 92                                      | Ccdc92        | Ccdc92 <sup>tm1b(KOMP)Mbp</sup>         | Hom    | M+F      | UCD    | Novel  | Mild   |
| calcium and integrin binding family member 2                          | Cib2          | Cib2 <sup>tm1b(EUCOMM)Wtsi</sup>        | Hom    | M+F      | H      | Known  | Severe |
| clarin 1                                                              | Clm1          | Clm1 <sup>tm1.1(KOMP)Vlclg</sup>        | Hom    | M+F      | UCD    | Known  | Severe |
| collagen, type IX, alpha 2                                            | Col9a2        | Col9a2 <sup>tm1b(EUCOMM)Wtsi</sup>      | Hom    | M+F      | H      | Known  | Severe |
| cytochrome b5 reductase 2                                             | Cyb5r2        | Cyb5r2 <sup>tm1b(EUCOMM)Hmgu</sup>      | Hom    | M+F      | H      | Novel  | Mild   |
| deoxyribonuclease I                                                   | Dnase1        | Dnase1 <sup>tm1.1(KOMP)Vlclg</sup>      | Hom    | M+F      | UCD    | Novel  | High   |
| dual oxidase maturation factor 2                                      | Duoxa2        | Duoxa2 <sup>tm1b(KOMP)Wtsi</sup>        | Hom    | M+F      | WTSI   | Novel  | Severe |
| ELMO/CED-12 domain containing 1                                       | Elmod1        | Elmod1 <sup>tm1b(EUCOMM)Hmgu</sup>      | Hom    | M+F      | H      | Known  | Severe |
| embigin                                                               | Emb           | Emb <sup>tm1b(KOMP)Wtsi</sup>           | Hom    | F        | UCD    | Novel  | High   |
| EPS8-like 1                                                           | Eps8l1        | Eps8l1 <sup>tm2b(KOMP)Wtsi</sup>        | Hom    | M+F      | UCD    | Novel  | Severe |
| Ewing sarcoma breakpoint region 1                                     | Ewsr1         | Ewsr1 <sup>tm1b(EUCOMM)Wtsi</sup>       | Het    | F        | TCP    | Novel  | High   |
| GATA binding protein 2                                                | Gata2         | Gata2 <sup>tm1b(KOMP)Wtsi</sup>         | Het    | M+F      | UCD    | Known  | Low    |
| golgi associated, gamma adaptin ear containing, ARF binding protein 1 | Gga1          | Gga1 <sup>tm1.1(KOMP)Vlclg</sup>        | Hom    | M+F      | UCD    | Novel  | Mild   |
| GIPC PDZ domain containing family, member 3                           | Gipc3         | Gipc3 <sup>tm1b(KOMP)Wtsi</sup>         | Hom    | M+F      | JAX    | Known  | Severe |
| G protein-coupled receptor 152                                        | Gpr152        | Gpr152 <sup>tm1b(EUCOMM)Wtsi</sup>      | Hom    | M+F      | WTSI   | Novel  | High   |
| G-protein-coupled                                                     | Gpr50         | Gpr50 <sup>tm1.1(KOMP)Vlclg</sup>       | Hom    | F        | UCD    | Novel  | Low    |

|                                                                                               |                 |                                              |     |     |      |       |        |  |
|-----------------------------------------------------------------------------------------------|-----------------|----------------------------------------------|-----|-----|------|-------|--------|--|
| <i>receptor 50</i>                                                                            |                 |                                              |     |     |      |       |        |  |
| <i>IKAROS family zinc finger 5</i>                                                            | <i>Ikzf5</i>    | <i>Ikzf5</i> <sup>tm1(KOMP)Wtsi</sup>        | Hom | M   | RBRC | Novel | High   |  |
| <i>interleukin 1 receptor, type II</i>                                                        | <i>Il1r2</i>    | <i>Il1r2</i> <sup>tm1.1(KOMP)Vlcg</sup>      | Hom | M+F | UCD  | Novel | Low    |  |
| <i>immunoglobulin-like domain containing receptor 1</i>                                       | <i>Ildr1</i>    | <i>Ildr1</i> <sup>tm1(KOMP)Wtsi</sup>        | Hom | M+F | WTSI | Known | Severe |  |
| <i>kinesin light chain 2</i>                                                                  | <i>Klc2</i>     | <i>Klc2</i> <sup>tm1e(EUCCOMM)Wtsi</sup>     | Hom | M+F | WTSI | Novel | Severe |  |
| <i>kelch-like 18</i>                                                                          | <i>Klhl18</i>   | <i>Klhl18</i> <sup>tm1a(KOMP)Wtsi</sup>      | Hom | M+F | WTSI | Novel | Low    |  |
| <i>MARVEL (membrane-associating) domain containing 2</i>                                      | <i>Marveld2</i> | <i>Marveld2</i> <sup>tm1b(EUCCOMM)Wtsi</sup> | Hom | M+F | H    | Known | Severe |  |
| <i>mediator complex subunit 28</i>                                                            | <i>Med28</i>    | <i>Med28</i> <sup>tm1.1(KOMP)Vlcg</sup>      | Het | M+F | UCD  | Novel | Low    |  |
| <i>multiple PDZ domain protein</i>                                                            | <i>Mpdz</i>     | <i>Mpdz</i> <sup>em1J</sup>                  | Hom | M+F | JAX  | Novel | Mild   |  |
| <i>myosin, heavy polypeptide 1, skeletal muscle, adult</i>                                    | <i>Myh1</i>     | <i>Myh1</i> <sup>tm1b(KOMP)Wtsi</sup>        | Hom | M+F | JAX  | Novel | Mild   |  |
| <i>myosin VIIA</i>                                                                            | <i>Myo7a</i>    | <i>Myo7a</i> <sup>tm1a(EUCCOMM)Wtsi</sup>    | Hom | M+F | WTSI | Known | Severe |  |
| <i>neural precursor cell expressed, developmentally down-regulated gene 4-like</i>            | <i>Nedd4l</i>   | <i>Nedd4l</i> <sup>tm1b(KOMP)Wtsi</sup>      | Hom | M+F | H    | Novel | Severe |  |
| <i>nuclear factor of activated T cells, cytoplasmic, calcineurin dependent 3</i>              | <i>Nfatc3</i>   | <i>Nfatc3</i> <sup>tm1b(EUCCOMM)Hmgu</sup>   | Het | M+F | GMC  | Novel | Low    |  |
| <i>ninein</i>                                                                                 | <i>Nin</i>      | <i>Nin</i> <sup>tm1b(EUCCOMM)Hmgu</sup>      | Hom | M   | RBRC | Novel | High   |  |
| <i>nischarin</i>                                                                              | <i>Nisch</i>    | <i>Nisch</i> <sup>tm1b(EUCCOMM)Hmgu</sup>    | Hom | M+F | H    | Novel | Mild   |  |
| <i>neuroplastin</i>                                                                           | <i>Nptn</i>     | <i>Nptn</i> <sup>tm1b(EUCCOMM)Hmgu</sup>     | Hom | M+F | H    | Novel | Severe |  |
| <i>oncomodulin</i>                                                                            | <i>Ocm</i>      | <i>Ocm</i> <sup>tm1e(EUCCOMM)Wtsi</sup>      | Hom | M+F | WTSI | Known | Severe |  |
| <i>outer dense fiber of sperm tails 3-like 2</i>                                              | <i>Odf3l2</i>   | <i>Odf3l2</i> <sup>tm1.1(KOMP)Vlcg</sup>     | Hom | M+F | UCD  | Novel | Mild   |  |
| <i>otoancorin</i>                                                                             | <i>Otoa</i>     | <i>Otoa</i> <sup>tm1.1(KOMP)Vlcg</sup>       | Hom | M+F | UCD  | Known | Severe |  |
| <i>PHD finger protein 6</i>                                                                   | <i>Phf6</i>     | <i>Phf6</i> <sup>tm1b(EUCCOMM)Wtsi</sup>     | Het | F   | ICS  | Novel | High   |  |
| <i>protein phosphatase 1A, magnesium dependent, alpha isoform</i>                             | <i>Ppm1a</i>    | <i>Ppm1a</i> <sup>tm1b(EUCCOMM)Hmgu</sup>    | Hom | M+F | H    | Novel | High   |  |
| <i>sema domain, immunoglobulin domain (Ig), short basic domain, secreted, (semaphorin) 3F</i> | <i>Sema3f</i>   | <i>Sema3f</i> <sup>tm1b(EUCCOMM)Hmgu</sup>   | Hom | M+F | H    | Novel | Low    |  |
| <i>solute carrier family 4, sodium bicarbonate cotransporter-like, member 10</i>              | <i>Slc4a10</i>  | <i>Slc4a10</i> <sup>tm1b(KOMP)Wtsi</sup>     | Hom | M+F | H    | Novel | Mild   |  |
| <i>solute carrier family 5 (sodium iodide symporter), member 5</i>                            | <i>Slc5a5</i>   | <i>Slc5a5</i> <sup>tm1b(KOMP)Wtsi</sup>      | Hom | M+F | JAX  | Novel | Severe |  |
| <i>spinster homolog 2</i>                                                                     | <i>Spns2</i>    | <i>Spns2</i> <sup>tm1b(KOMP)Wtsi</sup>       | Hom | M+F | WTSI | Novel | Severe |  |
| <i>serine/arginine repetitive matrix 4</i>                                                    | <i>Srrm4</i>    | <i>Srrm4</i> <sup>tm1e(EUCCOMM)Wtsi</sup>    | Hom | M+F | WTSI | Known | Mild   |  |
| <i>transmembrane protein 30B</i>                                                              | <i>Tmem30b</i>  | <i>Tmem30b</i> <sup>tm1b(EUCCOMM)Wtsi</sup>  | Hom | M+F | UCD  | Novel | Severe |  |
| <i>transmembrane and tetratricopeptide repeat containing 4</i>                                | <i>Tmtc4</i>    | <i>Tmtc4</i> <sup>tm1.1(KOMP)Vlcg</sup>      | Hom | M+F | UCD  | Novel | Severe |  |
| <i>thymocyte</i>                                                                              | <i>Tox</i>      | <i>Tox</i> <sup>tm1b(KOMP)Wtsi</sup>         | Hom | M+F | UCD  | Novel | Severe |  |

|                                                               |                |                                           |     |     |      |       |        |
|---------------------------------------------------------------|----------------|-------------------------------------------|-----|-----|------|-------|--------|
| <i>selection-associated high mobility group box taperin</i>   | <i>Tprn</i>    | <i>Tprn</i> <sup>tm1.1(KOMP)Vicg</sup>    | Hom | M+F | JAX  | Known | Severe |
| <i>translocating chain-associating membrane protein 2</i>     | <i>Tram2</i>   | <i>Tram2</i> <sup>tm1a(KOMP)Wtsi</sup>    | Hom | M+F | WTSI | Novel | Mild   |
| <i>ubiquitin-conjugating enzyme E2B</i>                       | <i>Ube2b</i>   | <i>Ube2b</i> <sup>tm1b(EUCOMM)Wtsi</sup>  | Het | M+F | H    | Novel | Mild   |
| <i>ubiquitin-conjugating enzyme E2G 1</i>                     | <i>Ube2g1</i>  | <i>Ube2g1</i> <sup>tm1b(EUCOMM)Hmgu</sup> | Hom | M   | RBRC | Novel | Mild   |
| <i>Usher syndrome 1C</i>                                      | <i>Ush1c</i>   | <i>Ush1c</i> <sup>tm1a(KOMP)Wtsi</sup>    | Hom | M+F | WTSI | Known | Severe |
| <i>vesicle transport through interaction with t-SNAREs 1A</i> | <i>Vti1a</i>   | <i>Vti1a</i> <sup>tm1.1(KOMP)Vicg</sup>   | Hom | M+F | UCD  | Novel | Mild   |
| <i>WD and tetratricopeptide repeats 1</i>                     | <i>Wdtd1</i>   | <i>Wdtd1</i> <sup>tm1a(KOMP)Wtsi</sup>    | Hom | M+F | WTSI | Novel | High   |
| <i>zinc finger, CCHC domain containing 14</i>                 | <i>Zcchc14</i> | <i>Zcchc14</i> <sup>tm1a(KOMP)Wtsi</sup>  | Hom | M+F | WTSI | Novel | Low    |
| <i>zinc finger protein 719</i>                                | <i>Zfp719</i>  | <i>Zfp719</i> <sup>tm1b(EUCOMM)Wtsi</sup> | Hom | M+F | WTSI | Novel | Severe |

For each of the 67 mutant strains exhibiting a hearing loss phenotype the following information is provided: Full gene name; Gene symbol; Allele tested; Zygosity of animals tested, homozygous (Hom) or heterozygous (Het); Sex of mice tested, males only (M), females only (F) or both (M+F); Phenotyping Centre, Harwell (H), Helmholtz Zentrum Munchen (GMC), Institut Clinique de la Souris (ICS), Jackson Laboratories (JAX), RIKEN Tsukuba Institute, BioResource Center (RBRC), The Centre for Phenogenomics (TCP), University of California, Davis (UCD), Wellcome Trust Sanger Institute (WTSI); Hearing loss gene status; and, Type of hearing loss.

**Supplementary Table 2:** Nine Hearing Loss-Associated Genes Not Showing an Auditory Phenotype in IMPC. Note that for six of these genes hearing loss is reported only in human patients. For the gene, *Myo3a*, the hearing loss in the reported homozygous mouse mutant is progressive and mild and might not have been detected in the IMPC screen. Similarly, for *P3h1*, hearing loss in the reported homozygous mouse mutant is mild. *Eya4* mutant heterozygotes were screened in IMPC and, though *Eya4* homozygotes show raised thresholds due to the development of otitis media, no data is available on auditory thresholds for *Eya4* heterozygote mice.

| Gene                                                     | Symbol       | Allele                                   | Zygoty | Screened | Deafness-association                                                                                                                                                                                                                                                                                                                                                                                                                                                                                                                                        | Refs                                                                                                                                                                        |
|----------------------------------------------------------|--------------|------------------------------------------|--------|----------|-------------------------------------------------------------------------------------------------------------------------------------------------------------------------------------------------------------------------------------------------------------------------------------------------------------------------------------------------------------------------------------------------------------------------------------------------------------------------------------------------------------------------------------------------------------|-----------------------------------------------------------------------------------------------------------------------------------------------------------------------------|
| <i>Activin A receptor, type 1</i>                        | <i>Acvr1</i> | <i>Acvr1</i> <sup>tm1.1(KOMP)Vlcg</sup>  | Het    | M+F      | Fibrodysplasia Ossificans Progressiva (FOP; #135100) is caused by heterozygous mutation in the <i>ACVR1</i> gene (#102576). To investigate the clinical features of this condition, Morales-Piga et al. evaluated a cohort of Spanish FOP patients. Of these, 7 of 18 (38.9%) reported some hearing loss.                                                                                                                                                                                                                                                   | Morales-Piga, A. et al. (2012). <i>Bone</i> . <b>51</b> :748-55                                                                                                             |
| <i>Crystallin, mu</i>                                    | <i>Crym</i>  | <i>Crym</i> <sup>tm1b(KOMP)Wtsi</sup>    | Hom    | M+F      | Heterozygous mutation in the <i>CRYM</i> gene (#123740) has been reported by Abe et al to cause autosomal dominant deafness, DFNA40 (#616357), in two separate Japanese families. To investigate the <i>in vivo</i> functions of <i>CRYM</i> , Suzuki et al generated mice with targeted disruption of the <i>Crym</i> gene ( <i>Crym</i> <sup>-/-</sup> ). Auditory assessment of these mice found that hearing thresholds of <i>Crym</i> <sup>-/-</sup> were not significantly different from those of <i>Crym</i> <sup>+/+</sup> mice.                   | Abe, S. et al. (2003). <i>American Journal of Human Genetics</i> . <b>72</b> :73-82<br>Suzuki, S. et al. (2007). <i>Molecular Endocrinology</i> . <b>21</b> :885-94         |
| <i>Dentin sialophosphoprotein</i>                        | <i>Dspp</i>  | <i>Dspp</i> <sup>tm1.1(KOMP)Vlcg</sup>   | Hom    | M+F      | Dentinogenesis imperfecta 1 (DGI1, #125490) is an autosomal dominant dental disease characterized by abnormal dentin production and mineralization and is caused by mutations in the <i>DSPP</i> gene (#125485). Xiao et al report three Chinese families with DGI1 due to different <i>DSPP</i> mutations, and affected individuals from two of these families also presented with progressive sensorineural high-frequency hearing loss (DFNA39).                                                                                                         | Xiao, S. et al. (2001). <i>Nature Genetics</i> . <b>27</b> :201-4                                                                                                           |
| <i>EYA transcriptional coactivator and phosphatase 4</i> | <i>Eya4</i>  | <i>Eya4</i> <sup>tm1b(KOMP)Wtsi</sup>    | Het    | M+F      | Autosomal dominant deafness, DFNA10 (#601316), is caused by heterozygous mutation in the <i>EYA4</i> gene (#603550). Wayne et al reported different missense mutations in two separate families segregating with postlingual, progressive, autosomal dominant hearing loss. Depreux et al generated and characterized <i>Eya4</i> -deficient ( <i>Eya4</i> <sup>-/-</sup> ) mice. These had severe hearing deficits and developed otitis media with effusion (no auditory threshold data is provided for heterozygous ( <i>Eya4</i> <sup>+/-</sup> ) mice). | Wayne, S. et al. (2001). <i>Human Molecular Genetics</i> . <b>10</b> :195-200<br>Depreux, FS. et al. (2008). <i>Journal of Clinical Investigation</i> . <b>118</b> :651-658 |
| <i>Gap junction protein, beta 3</i>                      | <i>Gjb3</i>  | <i>Gjb3</i> <sup>tm1.1(KOMP)Vlcg</sup>   | Het    | M+F      | Autosomal dominant deafness, DFNA2B (#612644), is caused by mutation in the <i>GJB3</i> gene (#603324), which encodes Connexin 31 (Cx31). To study the function of this gene in mice, Plum et al. generated a Cx31-deficient model ( <i>Gjb3</i> <sup>-/-</sup> ). While embryonic lethality was observed in null mice, some survived to adulthood. No morphological or functional inner ear defects were observed in the surviving <i>Gjb3</i> <sup>-/-</sup> mice, suggesting Cx31-deficiency is compensated for by other connexins.                      | Plum, A. et al. (2001). <i>Developmental Biology</i> . <b>231</b> :334-47                                                                                                   |
| <i>G-protein signalling modulator 2</i>                  | <i>Gpsm2</i> | <i>Gpsm2</i> <sup>tm1b(EUCOMM)Wtsi</sup> | Het    | M+F      | Chudley-McCullough syndrome (CMCS; #604213) is caused by homozygous or compound heterozygous mutations in the <i>GPSM2</i> gene (#609245). CMCS is an autosomal recessive neurologic disorder characterized by early-onset sensorineural deafness and specific brain anomalies on MRI. Bhonker et al utilized a targeted deletion line to assess the requirement of <i>Gpsm2</i> for hearing in the mouse. They found that while homozygous mutants were profoundly deaf, heterozygous mice had hearing thresholds that were similar to wild-type controls. | Bhonker, Y. et al. (2016). <i>Mammalian Genome</i> . <b>27</b> :29-46                                                                                                       |
| <i>Myosin IIIA</i>                                       | <i>Myo3a</i> | <i>Myo3a</i> <sup>tm1b(KOMP)Wtsi</sup>   | Hom    | M+F      | Autosomal recessive deafness, DFNB30 (#607101), is caused by mutations in the <i>MYO3A</i> gene (#606808). Walsh et al generated a mouse model ( <i>Myo3a</i> <sup>KU/KU</sup> ) that harbors a mutation equivalent to the nonsense allele responsible for the most severe human DFNB30 phenotype. While auditory function in these mice is impaired and progressively deteriorates with age, ABR thresholds measured at 2.5 months of age were only mildly elevated at 6 to 30 kHz.                                                                        | Walsh, VL. et al. (2011). <i>Mammalian Genome</i> . <b>22</b> :170-177                                                                                                      |
| <i>Snail family zinc finger 2</i>                        | <i>Snai2</i> | <i>Snai2</i> <sup>tm1.1(KOMP)Vlcg</sup>  | Hom    | F        | Waardenburg syndrome type 2D (#608890) is caused by homozygous deletion of the <i>SNAI2</i> gene (#602150), and characterized by pigmentary abnormalities of the hair, skin, and eyes, and congenital sensorineural hearing loss. Sánchez-Martín et                                                                                                                                                                                                                                                                                                         | Sánchez-Martín, M. et al. (2002). <i>Human Molecular Genetics</i> . <b>11</b> :3231-3236                                                                                    |

|                               |             |                                         |     |     |                                                                                                                                                                                                                                                                                                                                                                                                                                                              |                                                                                |
|-------------------------------|-------------|-----------------------------------------|-----|-----|--------------------------------------------------------------------------------------------------------------------------------------------------------------------------------------------------------------------------------------------------------------------------------------------------------------------------------------------------------------------------------------------------------------------------------------------------------------|--------------------------------------------------------------------------------|
|                               |             |                                         |     |     | al. investigated mice lacking <i>Snai2</i> and found them to have patchy deficiency of melanocytes, a phenotype similar to that observed in patients with Waardenburg syndrome. Hearing function was not assessed in the <i>Snai2</i> <sup>-/-</sup> mice, but hyperactivity and circling in some mutants was observed suggesting a possible inner ear defect.                                                                                               |                                                                                |
| <i>Prolyl 3-hydroxylase 1</i> | <i>P3h1</i> | <i>P3h1</i> <sup>tm1b(EUCOMM)Wtsi</sup> | Hom | M+F | Autosomal recessive osteogenesis imperfecta type VIII (OI8; #610915) is caused by homozygous or compound heterozygous mutation in the <i>Ph31</i> gene (#610339). While deafness is not reported in the clinical synopsis of OI8, hearing loss is a common problem for people with osteogenesis imperfecta. Pokidysheva <i>et al</i> report that <i>P3h1</i> null mice exhibit mild hearing impairment and abnormal morphology of the middle ear bone joints | Pokidysheva, E. <i>et al.</i> (2013). <i>Matrix Biology</i> . <b>32</b> :39-44 |

For each of the 9 discounted lines that have association with hearing loss the following information is provided: Full gene name; Gene symbol; Allele tested; Zygosity of animals tested, homozygous (Hom) or heterozygous (Het); Gender of mice tested, females only (F) or males and females (M+F); Details of the associated deafness phenotype, including Phenotype and Gene MIM numbers.



The majority of mutants (60 of the 67) display additional phenotypes, while only 7 (~10%) do not show phenodeviance for any other parameter tested. *P* value threshold <0.0001. Red, Phenodeviance detected; Blue, Phenodeviance detected including absent startle response; White, No phenodeviance detected; Grey, No data. White asterisk denotes a head bobbing/circling phenodeviance. For each mutant and procedure the number of significant phenotypes/number of parameters tested are given. All primary data are available on the IMPC portal.



**Supplementary Table 4.** Gene Ontology Analysis of known and novel hearing loss genes

| GO Categories | GO Term                                                                  | KNOWN AND NOVEL DEAFNESS GENES |         | KNOWN DEAFNESS GENES |         | NOVEL DEAFNESS GENES |         |
|---------------|--------------------------------------------------------------------------|--------------------------------|---------|----------------------|---------|----------------------|---------|
|               |                                                                          | Corrected p-value              | # Genes | Corrected p-value    | # Genes | Corrected p-value    | # Genes |
| BP            | sensory perception of sound                                              | 7.18E-78                       | 52      | 6.77E-90             | 52      | NA                   | NA      |
| BP            | sensory perception of mechanical stimulus                                | 5.61E-75                       | 52      | 5.47E-87             | 52      | NA                   | NA      |
| BP            | inner ear development                                                    | 1.80E-19                       | 23      | 8.54E-24             | 23      | NA                   | NA      |
| BP            | sensory perception                                                       | 1.20E-18                       | 52      | 4.01E-29             | 52      | NA                   | NA      |
| BP            | ear development                                                          | 4.12E-18                       | 23      | 2.07E-22             | 23      | NA                   | NA      |
| BP            | neurological system process                                              | 2.06E-17                       | 55      | 2.12E-27             | 54      | 1.00E+00             | 1       |
| BP            | system process                                                           | 2.05E-15                       | 59      | 3.68E-24             | 56      | 1.00E+00             | 3       |
| BP            | ear morphogenesis                                                        | 7.38E-15                       | 17      | 5.89E-18             | 17      | NA                   | NA      |
| BP            | inner ear morphogenesis                                                  | 2.35E-13                       | 15      | 4.63E-16             | 15      | NA                   | NA      |
| BP            | inner ear receptor cell differentiation                                  | 5.43E-13                       | 13      | 2.53E-15             | 13      | NA                   | NA      |
| BP            | mechanoreceptor differentiation                                          | 1.98E-12                       | 13      | 9.35E-15             | 13      | NA                   | NA      |
| BP            | inner ear receptor cell development                                      | 3.06E-11                       | 11      | 3.45E-13             | 11      | NA                   | NA      |
| BP            | sensory organ development                                                | 3.49E-11                       | 25      | 1.83E-14             | 24      | 1.00E+00             | 1       |
| BP            | hair cell differentiation                                                | 1.82E-10                       | 10      | 3.17E-12             | 10      | NA                   | NA      |
| BP            | inner ear receptor stereocilium organization                             | 1.29E-09                       | 9       | 3.46E-11             | 9       | NA                   | NA      |
| BP            | auditory receptor cell development                                       | 1.53E-09                       | 8       | 6.25E-11             | 8       | NA                   | NA      |
| BP            | auditory receptor cell stereocilium organization                         | 2.05E-09                       | 7       | 1.28E-10             | 7       | NA                   | NA      |
| BP            | auditory receptor cell differentiation                                   | 2.39E-09                       | 9       | 6.43E-11             | 9       | NA                   | NA      |
| BP            | embryonic organ morphogenesis                                            | 3.12E-09                       | 18      | 2.26E-12             | 18      | NA                   | NA      |
| BP            | sensory organ morphogenesis                                              | 4.30E-09                       | 17      | 4.66E-12             | 17      | NA                   | NA      |
| BP            | multicellular organismal process                                         | 6.94E-09                       | 91      | 1.88E-12             | 72      | 1.00E+00             | 19      |
| BP            | auditory receptor cell morphogenesis                                     | 1.35E-08                       | 7       | 8.45E-10             | 7       | NA                   | NA      |
| BP            | embryonic organ development                                              | 3.04E-08                       | 20      | 1.13E-11             | 20      | NA                   | NA      |
| BP            | anatomical structure morphogenesis                                       | 1.44E-07                       | 46      | 7.92E-10             | 39      | 1.00E+00             | 7       |
| BP            | neuroepithelial cell differentiation                                     | 1.80E-07                       | 9       | 5.06E-09             | 9       | NA                   | NA      |
| BP            | anatomical structure development                                         | 1.92E-07                       | 71      | 6.46E-10             | 57      | 1.00E+00             | 14      |
| BP            | epithelial cell development                                              | 5.01E-07                       | 14      | 2.04E-09             | 14      | NA                   | NA      |
| BP            | cell development                                                         | 1.13E-06                       | 39      | 1.16E-07             | 32      | 1.00E+00             | 7       |
| BP            | regulation of biological quality                                         | 1.40E-06                       | 50      | 1.18E-04             | 35      | 1.00E+00             | 15      |
| BP            | detection of mechanical stimulus involved in sensory perception of sound | 1.42E-06                       | 6       | 1.38E-07             | 6       | NA                   | NA      |
| BP            | single-multicellular organism process                                    | 1.52E-06                       | 72      | 1.94E-07             | 55      | 1.00E+00             | 17      |
| BP            | equilibrioception                                                        | 1.56E-06                       | 5       | 2.30E-07             | 5       | NA                   | NA      |
| BP            | embryo development                                                       | 1.72E-06                       | 27      | 1.25E-06             | 22      | 1.00E+00             | 5       |
| BP            | single-organism developmental process                                    | 1.88E-06                       | 72      | 1.46E-08             | 57      | 1.00E+00             | 15      |
| BP            | cellular component morphogenesis                                         | 2.43E-06                       | 30      | 7.05E-08             | 26      | 1.00E+00             | 4       |
| BP            | developmental process                                                    | 2.69E-06                       | 72      | 2.04E-08             | 57      | 1.00E+00             | 15      |
| BP            | animal organ development                                                 | 3.98E-06                       | 50      | 3.51E-09             | 43      | 1.00E+00             | 7       |
| BP            | cell morphogenesis                                                       | 8.32E-06                       | 28      | 5.29E-07             | 24      | 1.00E+00             | 4       |
| BP            | columnar/cuboidal epithelial cell development                            | 8.72E-06                       | 8       | 3.83E-07             | 8       | NA                   | NA      |

|    |                                                                 |          |    |          |    |          |    |
|----|-----------------------------------------------------------------|----------|----|----------|----|----------|----|
| BP | retina homeostasis                                              | 1.01E-05 | 8  | 4.44E-07 | 8  | NA       | NA |
| BP | epithelial cell differentiation                                 | 1.42E-05 | 19 | 1.12E-08 | 19 | NA       | NA |
| BP | neuromuscular process controlling balance                       | 1.53E-05 | 8  | 6.80E-07 | 8  | NA       | NA |
| BP | tissue homeostasis                                              | 1.78E-05 | 12 | 2.83E-06 | 11 | 1.00E+00 | 1  |
| BP | cell projection organization                                    | 1.99E-05 | 28 | 1.77E-04 | 21 | 1.00E+00 | 7  |
| BP | animal organ morphogenesis                                      | 2.23E-05 | 24 | 1.76E-07 | 22 | 1.00E+00 | 2  |
| BP | detection of mechanical stimulus                                | 2.29E-05 | 7  | 1.51E-06 | 7  | NA       | NA |
| BP | neuron development                                              | 3.76E-05 | 24 | 3.85E-04 | 18 | 1.00E+00 | 6  |
| BP | system development                                              | 4.22E-05 | 57 | 6.36E-07 | 46 | 1.00E+00 | 11 |
| BP | embryonic morphogenesis                                         | 4.78E-05 | 19 | 4.15E-08 | 19 | NA       | NA |
| BP | detection of mechanical stimulus involved in sensory perception | 4.95E-05 | 6  | 4.91E-06 | 6  | NA       | NA |
| BP | neuron differentiation                                          | 4.96E-05 | 27 | 1.18E-04 | 21 | 1.00E+00 | 6  |
| BP | multicellular organism development                              | 5.51E-05 | 61 | 2.32E-06 | 48 | 1.00E+00 | 13 |
| BP | epidermal cell differentiation                                  | 9.00E-05 | 11 | 1.34E-06 | 11 | NA       | NA |
| BP | columnar/cuboidal epithelial cell differentiation               | 1.25E-04 | 9  | 3.95E-06 | 9  | NA       | NA |
| BP | multicellular organismal homeostasis                            | 3.45E-04 | 13 | 3.01E-05 | 12 | 1.00E+00 | 1  |
| BP | photoreceptor cell maintenance                                  | 3.67E-04 | 6  | 3.72E-05 | 6  | NA       | NA |
| BP | generation of neurons                                           | 3.80E-04 | 27 | 6.34E-04 | 21 | 1.00E+00 | 6  |
| BP | cellular developmental process                                  | 5.28E-04 | 53 | 2.40E-06 | 44 | 1.00E+00 | 9  |
| BP | homeostatic process                                             | 1.10E-03 | 28 | 4.19E-03 | 21 | 1.00E+00 | 7  |
| BP | tissue development                                              | 1.45E-03 | 30 | 1.42E-06 | 28 | 1.00E+00 | 2  |
| BP | neuromuscular process                                           | 1.49E-03 | 8  | 7.27E-05 | 8  | NA       | NA |
| BP | neurogenesis                                                    | 1.74E-03 | 27 | 2.25E-03 | 21 | 1.00E+00 | 6  |
| BP | nervous system development                                      | 2.12E-03 | 33 | 3.79E-03 | 25 | 1.00E+00 | 8  |
| BP | cell morphogenesis involved in differentiation                  | 2.89E-03 | 18 | 2.28E-04 | 16 | 1.00E+00 | 2  |
| BP | anatomical structure homeostasis                                | 2.99E-03 | 12 | 3.72E-04 | 11 | 1.00E+00 | 1  |
| BP | epidermis development                                           | 4.86E-03 | 11 | 8.75E-05 | 11 | NA       | NA |
| BP | localization                                                    | 6.05E-03 | 61 | 1.00E+00 | 38 | 1.00E+00 | 23 |
| BP | cell differentiation                                            | 9.42E-03 | 47 | 3.48E-04 | 38 | 1.00E+00 | 9  |
| BP | sensory perception of light stimulus                            | 9.62E-03 | 8  | 4.99E-04 | 8  | NA       | NA |
| BP | detection of abiotic stimulus                                   | 1.09E-02 | 7  | 8.09E-04 | 7  | NA       | NA |
| BP | detection of external stimulus                                  | 1.17E-02 | 7  | 8.67E-04 | 7  | NA       | NA |
| BP | epithelium development                                          | 1.18E-02 | 21 | 1.00E-05 | 21 | NA       | NA |
| BP | cellular component organization                                 | 1.33E-02 | 61 | 2.31E-02 | 44 | 1.00E+00 | 17 |
| BP | response to mechanical stimulus                                 | 1.66E-02 | 9  | 6.27E-04 | 9  | NA       | NA |
| BP | establishment of localization                                   | 2.00E-02 | 51 | 1.00E+00 | 31 | 1.00E+00 | 20 |
| BP | cochlea development                                             | 2.22E-02 | 5  | 3.49E-03 | 5  | NA       | NA |
| BP | cellular component organization or biogenesis                   | 3.42E-02 | 61 | 4.95E-02 | 44 | 1.00E+00 | 17 |
| BP | cellular cation homeostasis                                     | 4.08E-02 | 13 | 1.23E-01 | 10 | 1.00E+00 | 3  |
| CC | stereocilium                                                    | 1.10E-40 | 24 | 2.27E-45 | 24 | NA       | NA |
| CC | stereocilium bundle                                             | 5.43E-40 | 25 | 6.78E-45 | 25 | NA       | NA |
| CC | cluster of actin-based cell projections                         | 4.28E-31 | 29 | 8.00E-37 | 29 | NA       | NA |
| CC | actin-based cell projection                                     | 3.53E-24 | 26 | 3.50E-29 | 26 | NA       | NA |
| CC | neuron part                                                     | 3.11E-17 | 44 | 3.41E-14 | 33 | 2.10E-01 | 11 |
| CC | stereocilium tip                                                | 1.31E-12 | 8  | 5.26E-14 | 8  | NA       | NA |
| CC | cell projection                                                 | 8.24E-12 | 44 | 8.32E-11 | 34 | 1.00E+00 | 10 |

|    |                                 |          |     |          |    |          |    |
|----|---------------------------------|----------|-----|----------|----|----------|----|
| CC | plasma membrane region          | 4.97E-08 | 27  | 5.99E-08 | 22 | 1.00E+00 | 5  |
| CC | cell projection part            | 3.32E-07 | 26  | 2.11E-05 | 19 | 1.00E+00 | 7  |
| CC | apical part of cell             | 4.01E-07 | 17  | 1.05E-06 | 14 | 1.00E+00 | 3  |
| CC | synapse                         | 8.24E-05 | 20  | 2.81E-02 | 13 | 1.00E+00 | 7  |
| CC | actin cytoskeleton              | 3.75E-04 | 15  | 9.78E-04 | 12 | 1.00E+00 | 3  |
| CC | myosin complex                  | 4.45E-04 | 7   | 8.97E-04 | 6  | 1.00E+00 | 1  |
| CC | apical plasma membrane          | 6.90E-04 | 12  | 9.45E-04 | 10 | 1.00E+00 | 2  |
| CC | nonmotile primary cilium        | 8.42E-04 | 9   | 2.81E-05 | 9  | NA       | NA |
| CC | cell junction                   | 1.65E-03 | 24  | 1.69E-03 | 19 | 1.00E+00 | 5  |
| CC | plasma membrane part            | 1.83E-03 | 36  | 1.10E-03 | 28 | 1.00E+00 | 8  |
| CC | microvillus                     | 2.00E-03 | 7   | 1.42E-04 | 7  | NA       | NA |
| CC | cell-cell junction              | 6.62E-03 | 13  | 2.88E-02 | 10 | 1.00E+00 | 3  |
| CC | primary cilium                  | 8.31E-03 | 9   | 3.03E-04 | 9  | NA       | NA |
| CC | stereocilia coupling link       | 1.25E-02 | 3   | 4.29E-03 | 3  | NA       | NA |
| CC | cell periphery                  | 1.27E-02 | 62  | 1.02E-01 | 43 | 1.00E+00 | 19 |
| CC | organelle                       | 1.29E-02 | 109 | 1.00E+00 | 71 | 1.00E+00 | 38 |
| CC | photoreceptor inner segment     | 1.74E-02 | 5   | 2.73E-03 | 5  | NA       | NA |
| CC | brush border                    | 1.94E-02 | 7   | 1.47E-03 | 7  | NA       | NA |
| CC | kinocilium                      | 2.17E-02 | 3   | 7.47E-03 | 3  | NA       | NA |
| CC | plasma membrane                 | 2.97E-02 | 60  | 1.43E-01 | 42 | 1.00E+00 | 18 |
| MF | actin binding                   | 1.66E-06 | 17  | 3.40E-05 | 13 | 1.00E+00 | 4  |
| MF | actin filament binding          | 2.15E-04 | 9   | 2.38E-03 | 7  | 1.00E+00 | 2  |
| MF | cytoskeletal protein binding    | 2.24E-04 | 21  | 6.52E-03 | 15 | 1.00E+00 | 6  |
| MF | actin-dependent ATPase activity | 2.02E-03 | 4   | 4.59E-04 | 4  | NA       | NA |
| MF | calmodulin binding              | 2.15E-03 | 9   | 1.63E-01 | 6  | 1.00E+00 | 3  |
| MF | protein binding                 | 3.14E-03 | 101 | 1.88E-01 | 67 | 1.00E+00 | 34 |
| MF | motor activity                  | 9.62E-03 | 8   | 9.12E-02 | 6  | 1.00E+00 | 2  |
| MF | microfilament motor activity    | 1.21E-02 | 4   | 2.78E-03 | 4  | NA       | NA |

NA: No data available, BP: Biological Process, CC: Cellular Component, MF: Molecular Function
